# Supplementary material for: Mechanistic study of the formation of arbutin polymorphs and solvates
Source: Royal Society of Chemistry journal article supplement (doi:10.1039/d2ce01670b), 2023-01-01
Supplement: d2ce01670b1.pdf [file d2ce01670b1.pdf]

## *Supporting Information*

### **Mechanistic study on the formation of Arbutin polymorphs and solvates**

Mukaidaisi·Taiwaikuli,<sup>a</sup> Ting Wang,<sup>\*a,b</sup> Kui Chen,<sup>a</sup> Yaoguang Feng,<sup>a</sup>  
Jiangna Xing,<sup>a</sup> Xin Huang,<sup>a,b</sup> Na Wang,<sup>a,b</sup> Lina Zhou,<sup>a,b</sup> Hongxun Hao,<sup>\*a,b</sup>

<sup>a</sup> National Engineering Research Center of Industrial Crystallization Technology, School of Chemical Engineering and Technology, Tianjin University, Tianjin 300072, China.

<sup>b</sup> Collaborative Innovation Center of Chemical Science and Engineering (Tianjin), Tianjin 300072, China.

TableS1. Solvents used for screening and the results of obtained crystal forms

| Solvent        | Results |
|----------------|---------|
| methanol       | Form I  |
| ethanol        | Form I  |
| n-propanol     | Form I  |
| isopropanol    | Form I  |
| sec-Butanol    | Form I  |
| isobutanol     | Form I  |
| glycol         | Form I  |
| n-Pentanol     | Form I  |
| Acetone        | Form I  |
| 2-butanone     | Form I  |
| Acetonitrile   | Form I  |
| methyl acetate | Form I  |
| ethyl acetate  | Form I  |

|                  |         |
|------------------|---------|
| butyl acetate    | Form I  |
| 1,4-dioxane      | Form I  |
| dichloromethane  | Form I  |
| trichloromethane | Form I  |
| pyridine         | Form I  |
| tetrahydrofuran  | Form I  |
| formamide        | Form I  |
| DMSO             | -       |
| DMF              | Solvate |
| DMA              | Solvate |
| NMP              | Solvate |
| Water            | Solvate |
| NMP + methanol   | Solvate |

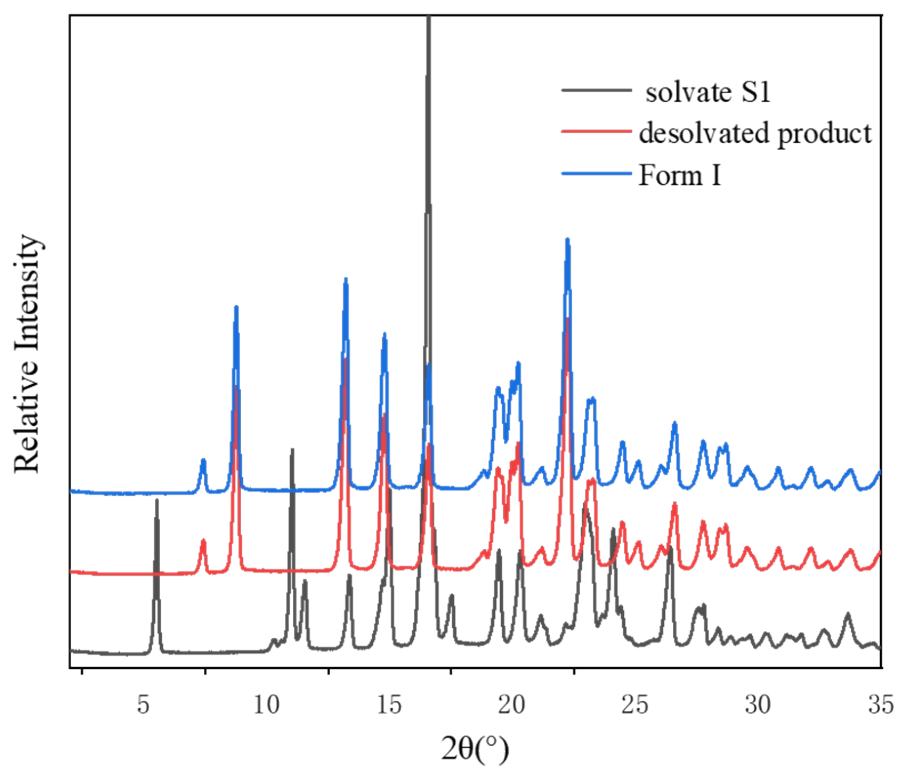

(a)

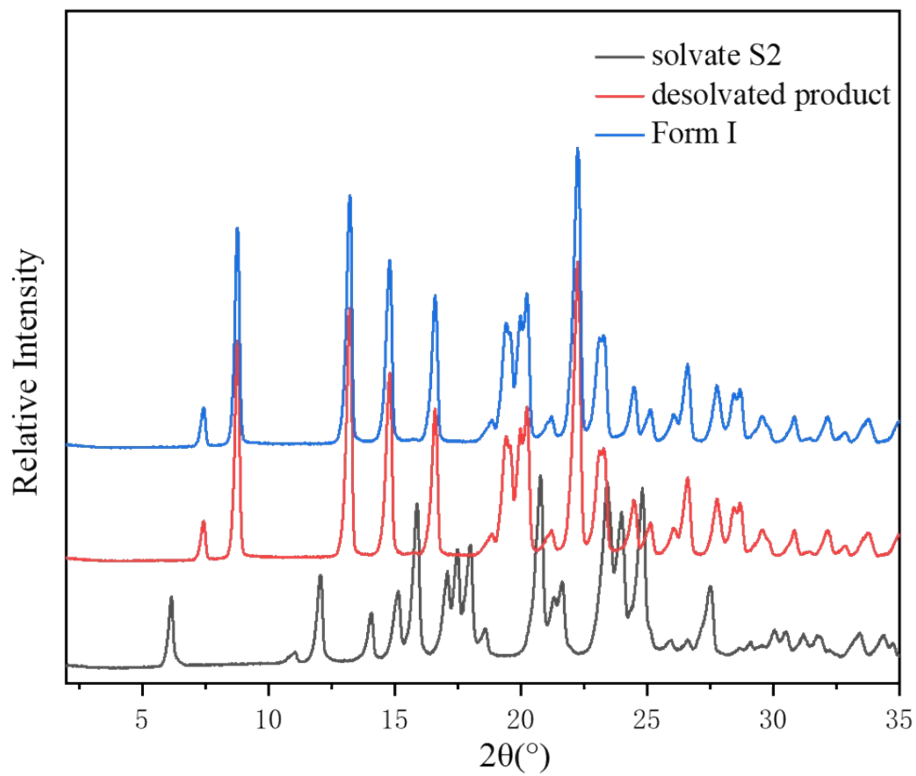

(b)

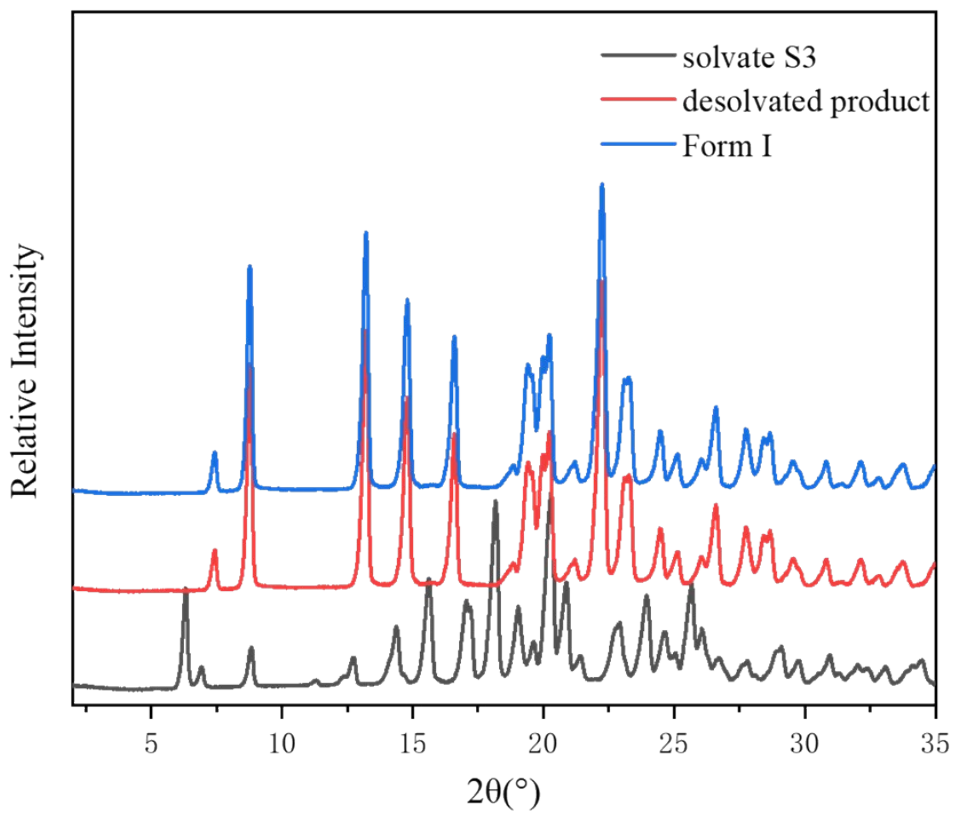

(c)

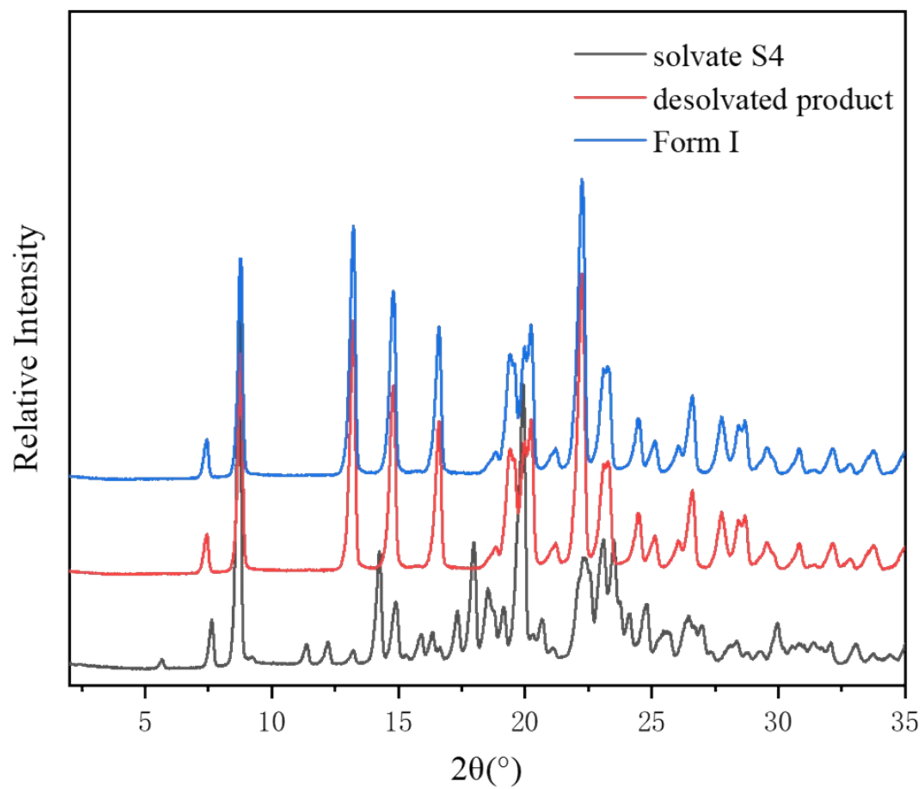

(d)

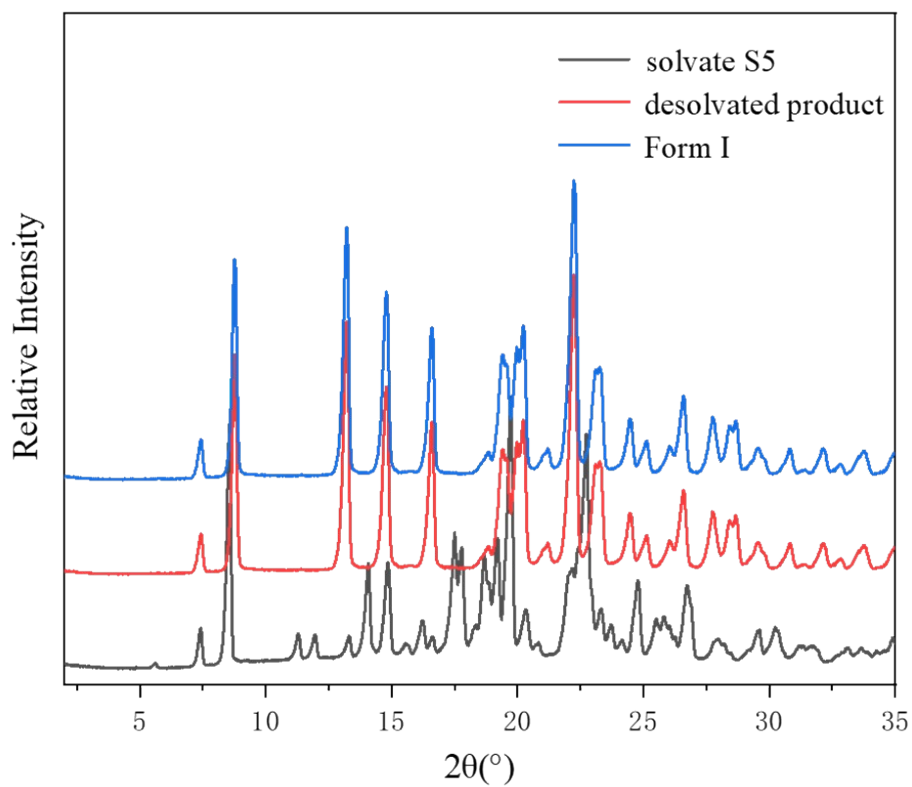

(e)

Figure S1. Comparison of desolvated products, (a) solvate S1, (b) solvate S2, (c) solvate S3, (d) solvate S4, (e) solvate S5.

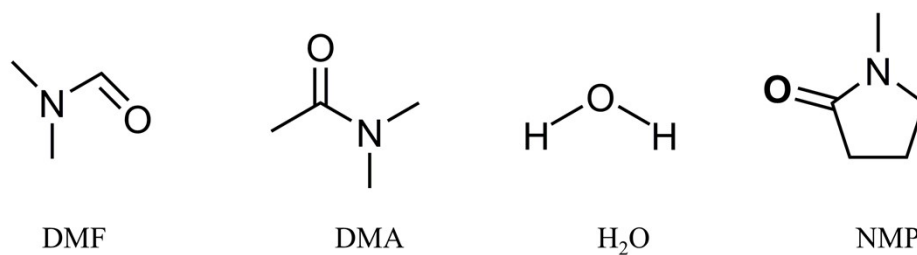

Figure S2. Molecular structures of the solvents.

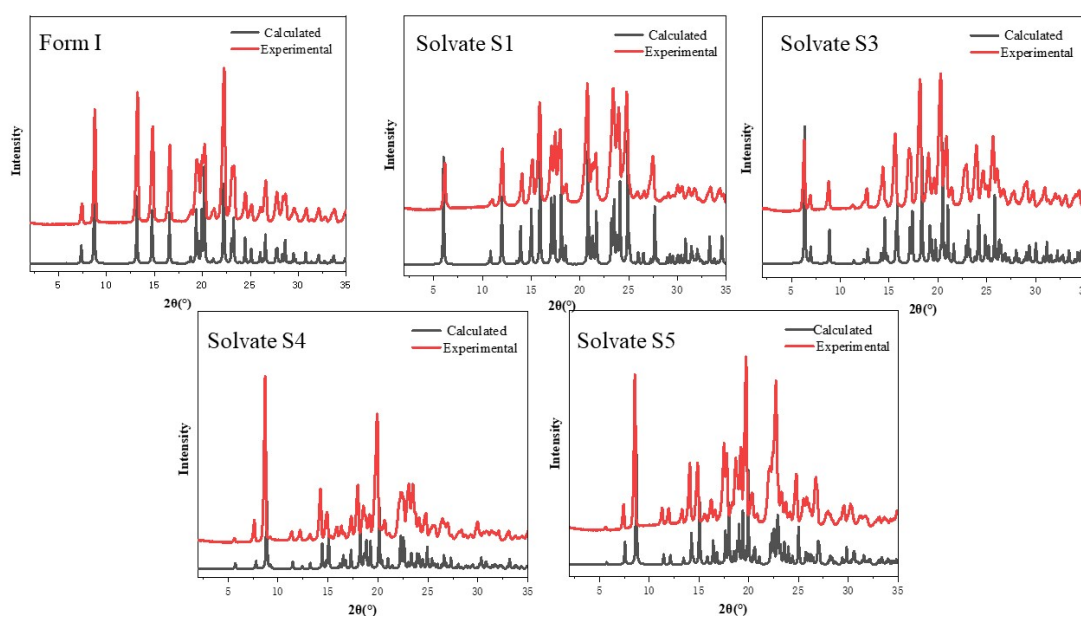

Figure S3. The calculated and experimented PXRD of arbutin different solid forms.

Table S2. Torsion Angles ( $\tau$ , deg) for Various Conformers of ARB ( $\tau_1$

(C<sub>4</sub>O<sub>2</sub>C<sub>7</sub>C<sub>11</sub>),  $\tau_2$ (C<sub>4</sub>O<sub>2</sub>C<sub>7</sub>O<sub>3</sub>),  $\tau_3$ (O<sub>3</sub>C<sub>8</sub>C<sub>12</sub>O<sub>4</sub>),  $\tau_4$ (O<sub>1</sub>C<sub>1</sub>C<sub>2</sub>C<sub>3</sub>),  $\tau_5$ (O<sub>1</sub>C<sub>1</sub>C<sub>6</sub>C<sub>5</sub>)

|          | Form I(A) | Form I(B) | Form I(C) | Form I(D) | solvate S1(E) | solvate S3(F) | solvate S3(G) | solvate S4(H) | solvate S4(I) | solvate S5(J) | solvate S5(K) |
|----------|-----------|-----------|-----------|-----------|---------------|---------------|---------------|---------------|---------------|---------------|---------------|
| $\tau_1$ | 150.61    | 155.94    | 156.80    | 150.45    | 157.04        | 152.18        | 148.54        | 166.36        | 168.61        | 161.67        | 170.23        |
| $\tau_2$ | -90.13    | -84.77    | -84.52    | -90.76    | -85.05        | -89.67        | -94.23        | -77.53        | -73.65        | -81.85        | -72.53        |
| $\tau_3$ | -68.54    | -66.18    | -66.01    | -70.05    | 58.47         | -60.16        | -63.58        | -61.34        | -68.38        | -63.47        | -68.53        |
| $\tau_4$ | 179.19    | 178.46    | -179.37   | 178.19    | 178.49        | 179.02        | 177.84        | -178.63       | -176.87       | -179.10       | -177.40       |
| $\tau_5$ | -178.11   | -177.27   | -179.16   | -176.88   | -177.98       | -177.64       | -176.69       | 179.23        | 177.91        | 179.95        | 178.23        |

Table S3. Hydrogen bonds in crystal structures of various solid forms of arbutin.

|               | D-H...A        | D-H   | H...A | D...A  | D-H...A         | Symmetric code    |
|---------------|----------------|-------|-------|--------|-----------------|-------------------|
| Form I        | O1-H1...O6A    | 0.82  | 1.931 | 2.711  | 158.66          | x-1, y+1, z       |
|               | O4-H4...O5     | 0.82  | 2.109 | 2.827  | 146.11          | x, y+1, z         |
|               | O5-H5...O4A    | 0.82  | 1.92  | 2.739  | 175.97          | -x+1, y-1/2, -z+1 |
|               | O6-H6...O1A    | 0.82  | 1.899 | 2.715  | 173.75          |                   |
|               | O7-H7...O7B    | 0.82  | 1.967 | 2.749  | 159.1           | x, y-1, z         |
|               | C3-H3...O3     | 0.93  | 2.625 | 3.119  | 113.81          |                   |
|               | O1A-H1A...O6   | 0.82  | 2.044 | 2.771  | 147.65          | x, y+1, z         |
|               | O4A-H4A...O5A  | 0.82  | 2.042 | 2.773  | 148.31          | x, y+1, z         |
|               | O5A-H5AA...O4  | 0.82  | 1.904 | 2.71   | 167.47          | -x+1, y-1/2, -z+1 |
|               | O6A-H6AA...O1  | 0.82  | 2.01  | 2.815  | 167.04          | x+1, y, z         |
|               | O7A-H7AA...O7D | 0.82  | 2.009 | 2.768  | 153.71          | -x+1, y-1/2, -z   |
|               | O1B-H1B...O6D  | 0.82  | 1.925 | 2.727  | 165.75          | -x+1, y+3/2, -z   |
|               | O4B-H4B...O5B  | 0.82  | 2.11  | 2.854  | 150.76          | x, y+1, z         |
|               | O5B-H5B...O4B  | 0.82  | 1.92  | 2.736  | 174.02          | -x, y-1/2, -z     |
|               | O6B-H6B...O1D  | 0.82  | 2.027 | 2.814  | 160.72          | -x, y-1/2, -z     |
|               | O7B-H7B... O7  | 0.82  | 2.119 | 2.764  | 135.44          |                   |
|               | C2B-H2B...O4D  | 0.93  | 2.654 | 3.546  | 161             |                   |
|               | C3B-H3B...O3B  | 0.93  | 2.605 | 3.109  | 114.54          |                   |
|               | O1D-H1D...O6B  | 0.82  | 1.921 | 2.722  | 165.15          | -x, y-1/2, -z     |
|               | O4D-H4D...O5D  | 0.82  | 2.045 | 2.759  | 145.27          | x, y+1, z         |
| O5D-H5D...O4D | 0.82           | 1.904 | 2.72  | 173.74 | -x+1, y-1/2, -z |                   |
| O6D-H6D...O1B | 0.82           | 2.009 | 2.817 | 168.67 | -x+1, y-1/2, -z |                   |
| O7D-H7D...O7A | 0.82           | 2.321 | 2.767 | 114.72 | -x+1, y-1/2, -z |                   |
| Solvate S1    | O1-H1...O9     | 0.84  | 1.815 | 2.637  | 165.67          | x-1, y-1, z       |
|               | O4-H4...O8     | 0.84  | 1.952 | 2.771  | 164.79          |                   |
|               | O5-H5...O7     | 0.84  | 1.896 | 2.718  | 165.69          | -x, y+1/2, -z-1   |
|               | O6-H6...O4     | 0.84  | 1.956 | 2.784  | 168.09          | x+1, y, z         |
|               | O7-H7...O8     | 0.84  | 1.82  | 2.653  | 171.41          | x+1, y, z         |
|               | C3-H3...O3     | 0.95  | 2.47  | 3.051  | 119.42          |                   |
|               | C7-H7A...O6    | 1     | 2.595 | 3.461  | 144.86          | -x, y-1/2, -z-1   |
|               | C10-H10...O6   | 1     | 2.624 | 3.482  | 143.96          | -x, y-1/2, -z-1   |
|               | C15-H15B...O1  | 0.98  | 2.495 | 3.457  | 166.72          | -x-2, y+1/2, -z-2 |
|               | C16-H16...O5   | 0.95  | 2.427 | 3.367  | 170.14          | -x, y+1/2, -z-1   |

|            |                            |       |       |       |        |                     |
|------------|----------------------------|-------|-------|-------|--------|---------------------|
|            | C17-H17B...O2              | 0.98  | 2.497 | 3.443 | 162.23 |                     |
| Solvate S3 | O1-H1...O8 <sup>a</sup>    | 0.82  | 1.971 | 2.786 | 171.97 | -x, y-1/2, -z+3/2   |
|            | O1-H1...O9 <sup>b</sup>    | 0.82  | 1.725 | 2.538 | 170.56 | -x, y-1/2, -z+3/2   |
|            | O4-H4...O3A                | 0.82  | 1.946 | 2.766 | 176.94 |                     |
|            | O5-H5...O6A                | 0.82  | 1.989 | 2.804 | 172.2  | x+1/2, -y+3/2, -z+1 |
|            | O6-H6...O5                 | 0.82  | 1.91  | 2.718 | 168.63 | x-1/2, -y+1/2, -z+1 |
|            | O7-H7...O6                 | 0.82  | 1.938 | 2.752 | 171.36 | x-1/2, -y+1/2, -z+1 |
|            | C2-H2...O8 <sup>a</sup>    | 0.93  | 2.62  | 3.305 | 130.85 | -x, y-1/2, -z+3/2   |
|            | C3-H3...O3                 | 0.93  | 2.565 | 3.126 | 119.2  |                     |
|            | C7-H7A...O1A               | 0.98  | 2.501 | 3.398 | 152.1  | -x+1, y-1/2, -z+3/2 |
|            | C12-H12B...O2              | 0.97  | 2.559 | 3.184 | 122.18 | x+1, y, z           |
|            | O1A-H1A...O10              | 0.82  | 2.003 | 2.78  | 157.88 | -x+1, y-1/2, -z+3/2 |
|            | O4A-H4A...O3               | 0.82  | 2.046 | 2.861 | 172.48 |                     |
|            | O5A-H5AA...O4              | 0.82  | 1.881 | 2.678 | 163.94 | x-1/2, -y+3/2, -z+1 |
|            | O6A-H6AA...O4A             | 0.82  | 1.99  | 2.804 | 172.07 | x+1/2, -y+3/2, -z+1 |
|            | O7A-H7AA...O5A             | 0.82  | 1.969 | 2.785 | 173.47 | x+1, y, z           |
|            | C7A-H7AB...O1              | 0.98  | 2.52  | 3.43  | 154.32 | -x, y+1/2, -z+3/2   |
|            | C12A-H12D...O2A            | 0.97  | 2.545 | 3.152 | 120.69 | x-1, y, z           |
|            | O10-H10B...O7A             | 0.85  | 1.944 | 2.741 | 155.52 |                     |
|            | O10-H10C...O8 <sup>a</sup> | 0.85  | 2.019 | 2.862 | 171.5  | x+1, y, z           |
|            | O10-H10C...O9 <sup>b</sup> | 0.85  | 2.059 | 2.902 | 171.79 | x+1, y, z           |
| Solvate S4 | O1-H1...O4A                | 0.84  | 1.936 | 2.757 | 165.52 | -x+3/2, -y+1, z+1/2 |
|            | O4-H4...O7A                | 0.848 | 1.898 | 2.737 | 169.7  | x-1, y, z           |
|            | O5-H5...O6A                | 0.847 | 2.109 | 2.869 | 149.12 | x-1, y, z           |
|            | O5-H5...O7A                | 0.847 | 2.403 | 3.063 | 135.12 | x-1, y, z           |
|            | O6-H6...O8                 | 0.84  | 1.882 | 2.635 | 148.45 | -x+1/2, -y+1, z-1/2 |
|            | O7-H7...O5                 | 0.851 | 2.001 | 2.764 | 148.96 | x+1, y, z           |
|            | C2-H2...O7                 | 0.95  | 2.641 | 3.482 | 147.74 | x-1/2, -y+3/2, -z+1 |
|            | C6-H6A...O4A               | 0.95  | 2.416 | 3.132 | 131.94 | -x+3/2, -y+1, z+1/2 |
|            | C9-H9...O7A                | 1     | 2.565 | 3.212 | 122.23 | x-1, y, z           |
|            | C10-H10...O1               | 1     | 2.542 | 3.529 | 169.05 | x-1/2, -y+3/2, -z+1 |
|            | O1A-H1A...O4               | 0.84  | 1.922 | 2.756 | 171.84 | x+1/2, -y+1/2, -z+1 |
|            | O4A-H4A...O7               | 0.84  | 1.898 | 2.73  | 170.53 | -x+1, y-1/2, -z+1/2 |
|            | O5A-H5AA...O8              | 0.84  | 1.944 | 2.737 | 156.94 | -x+1/2, -y+1, z-1/2 |
|            | O6A-H6AA...O6              | 0.84  | 1.901 | 2.731 | 169.58 |                     |
|            | O7A-H7AA...O5A             | 0.84  | 1.884 | 2.667 | 154.48 | x+1, y, z           |
|            | C2A-H2A...O4               | 0.95  | 2.494 | 3.205 | 131.68 | x+1/2, -y+1/2, -z+1 |
|            | C3A-H3A...O3A              | 0.95  | 2.419 | 3.013 | 120.38 |                     |
|            | C11A-H11A...O5A            | 1     | 2.629 | 3.142 | 111.89 | x+1, y, z           |
| Solvate S5 | O1-H1...O4A                | 0.84  | 1.938 | 2.752 | 162.99 | x+1/2, -y+1/2, -z+1 |
|            | O4-H4...O7A                | 0.84  | 1.94  | 2.769 | 168.72 | -x+1, y-1/2, -z+1/2 |
|            | O5-H5...O8 <sup>a</sup>    | 0.84  | 1.838 | 2.63  | 156.57 |                     |
|            | O5-H5...O8A <sup>b</sup>   | 0.84  | 2.15  | 2.924 | 153.16 |                     |
|            | O6-H6...O6A                | 0.84  | 1.885 | 2.723 | 175.53 |                     |
|            | O7-H7...O5                 | 0.84  | 1.865 | 2.662 | 157.8  | x+1, y, z           |
|            | C2-H2...O4A                | 0.95  | 2.45  | 3.17  | 132.47 | x+1/2, -y+1/2, -z+1 |
|            | C3-H3...O3                 | 0.95  | 2.442 | 3.038 | 120.62 |                     |
|            | C11-H11...O5               | 1     | 2.606 | 3.124 | 112.19 | x+1, y, z           |
|            | O1A-H1A...O4               | 0.84  | 1.926 | 2.755 | 168.96 | -x+3/2, -y+1, z+1/2 |
|            | O4A-H4A...O7               | 0.84  | 1.933 | 2.756 | 166.1  | x-1, y, z           |
|            | O5A-H5AA...O6              | 0.851 | 2.157 | 2.889 | 144.1  | x-1, y, z           |

|                     |       |       |       |        |                     |
|---------------------|-------|-------|-------|--------|---------------------|
| O5A-H5AA...O7       | 0.851 | 2.301 | 2.999 | 139.45 | x-1, y, z           |
| O6A-H6AA...O8^a     | 0.84  | 1.938 | 2.674 | 145.73 |                     |
| O6A-H6AA...O8A^b    | 0.84  | 1.823 | 2.604 | 153.78 |                     |
| O7A-H7AA...O5A      | 0.845 | 1.982 | 2.793 | 160.44 | x+1, y, z           |
| C2A-H2A...O7A       | 0.95  | 2.528 | 3.329 | 142.05 | x-1/2, -y+3/2, -z+1 |
| C6A-H6AB...O4       | 0.95  | 2.464 | 3.167 | 130.79 | -x+3/2, -y+1, z+1/2 |
| C9A-H9A...O7        | 1     | 2.532 | 3.174 | 121.69 | x-1, y, z           |
| C10A-H10A...O1A     | 1     | 2.599 | 3.595 | 173.9  | x-1/2, -y+3/2, -z+1 |
| C17^a-H17A^a...O5A  | 0.98  | 2.607 | 3.253 | 123.63 |                     |
| C15A^b-H15C^b...O5A | 0.99  | 2.635 | 3.429 | 137.34 |                     |

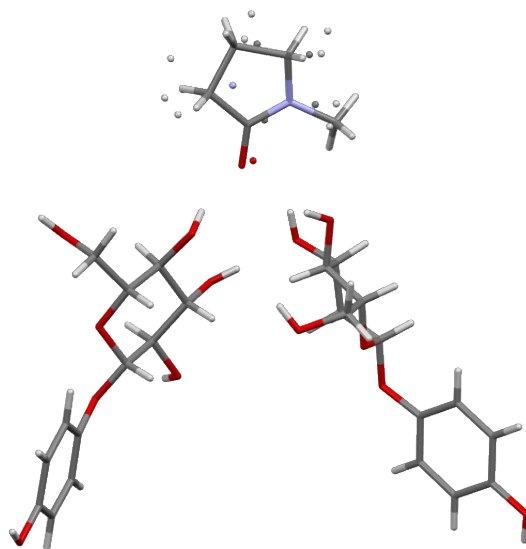

Figure S4. The disorder packing arrangements of solvate S5



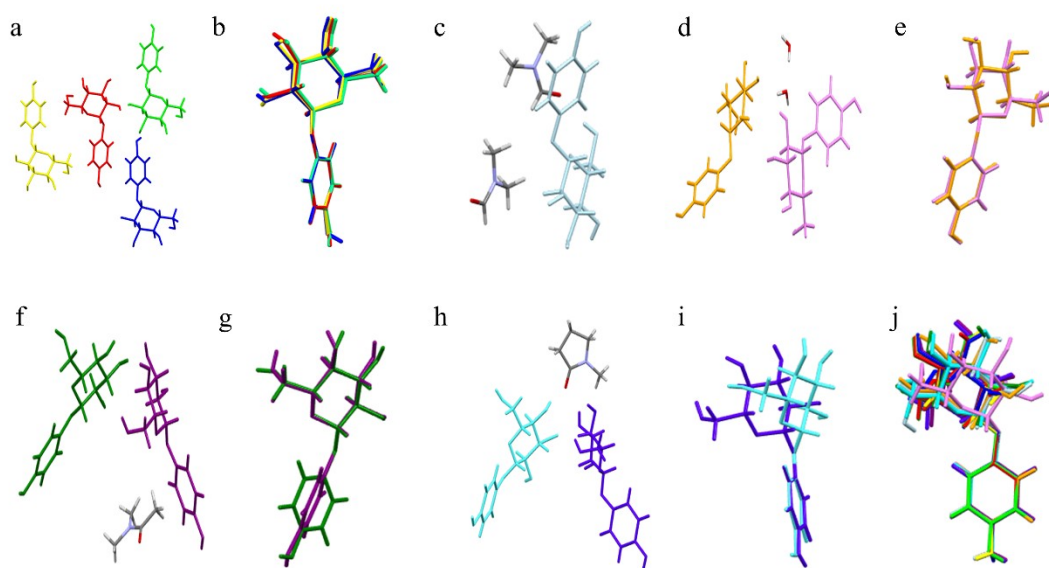

Figure S5. a) asymmetric unit of Form I, b) overlay diagram of different conformers in Form I, c) asymmetric unit of Solvate S1, d) asymmetric unit of Solvate S3, e) overlay diagram of different conformers in Solvate S3, f) asymmetric unit of Solvate S4, g) overlay diagram of different conformers in Solvate S4, h) asymmetric unit of Solvate S5, i) overlay diagram of different conformers in Solvate S5, j) overlay diagram of different conformers of all different solid forms of arbutin.

|                   | Form I.cif | solvate S1.cif | solvate S3.cif | solvate S4.cif | solvate S5.cif |
|-------------------|------------|----------------|----------------|----------------|----------------|
|                   | 0          | 1              | 2              | 3              | 4              |
| 0: Form I.cif     | 0.0000     | 38.6960        | 37.1419        | 32.4862        | 33.6135        |
| 1: solvate S1.cif | 38.6960    | 0.0000         | 33.4074        | 37.2288        | 36.1969        |
| 2: solvate S3.cif | 37.1419    | 33.4074        | 0.0000         | 28.8572        | 27.2125        |
| 3: solvate S4.cif | 32.4862    | 37.2288        | 28.8572        | 0.0000         | 0.3125         |
| 4: solvate S5.cif | 33.6135    | 36.1969        | 27.2125        | 0.3125         | 0.0000         |

Figure S6. The three-dimensional stacking similarity index of arbutin solid

forms.

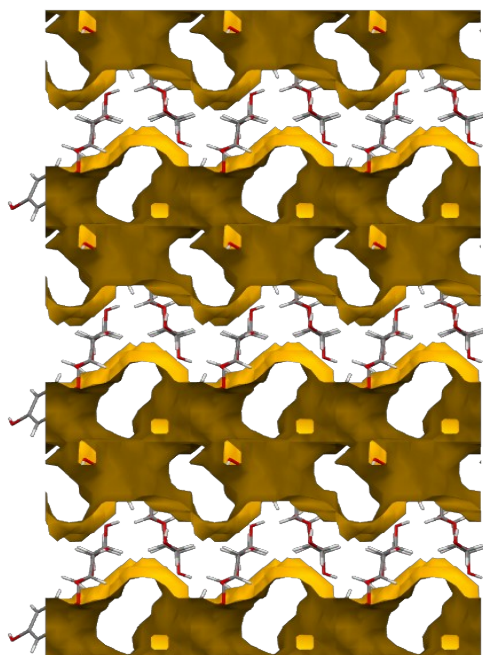

(a)

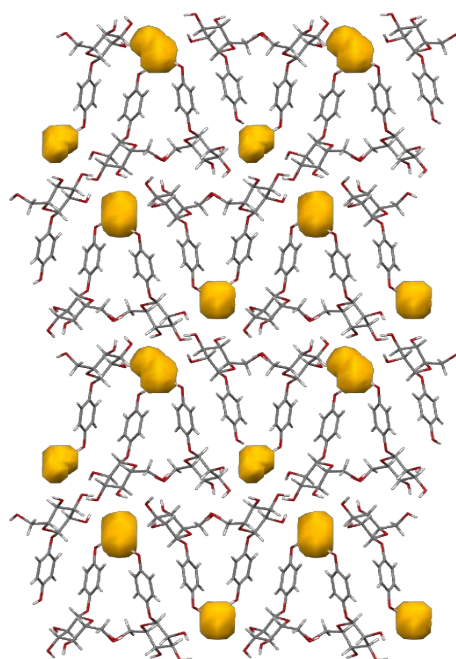

(b)

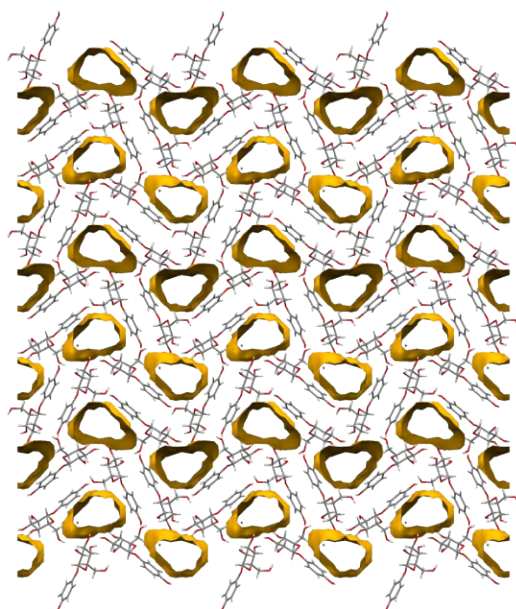

(c)

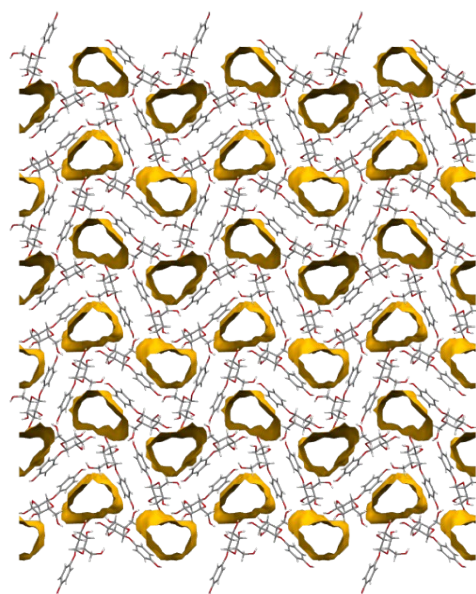

(d)

Figure S7. Void maps in the crystal structures of solvates: (a) Solvate S1, (b) Solvate S3, (c) Solvate S4, and (d) Solvate S5

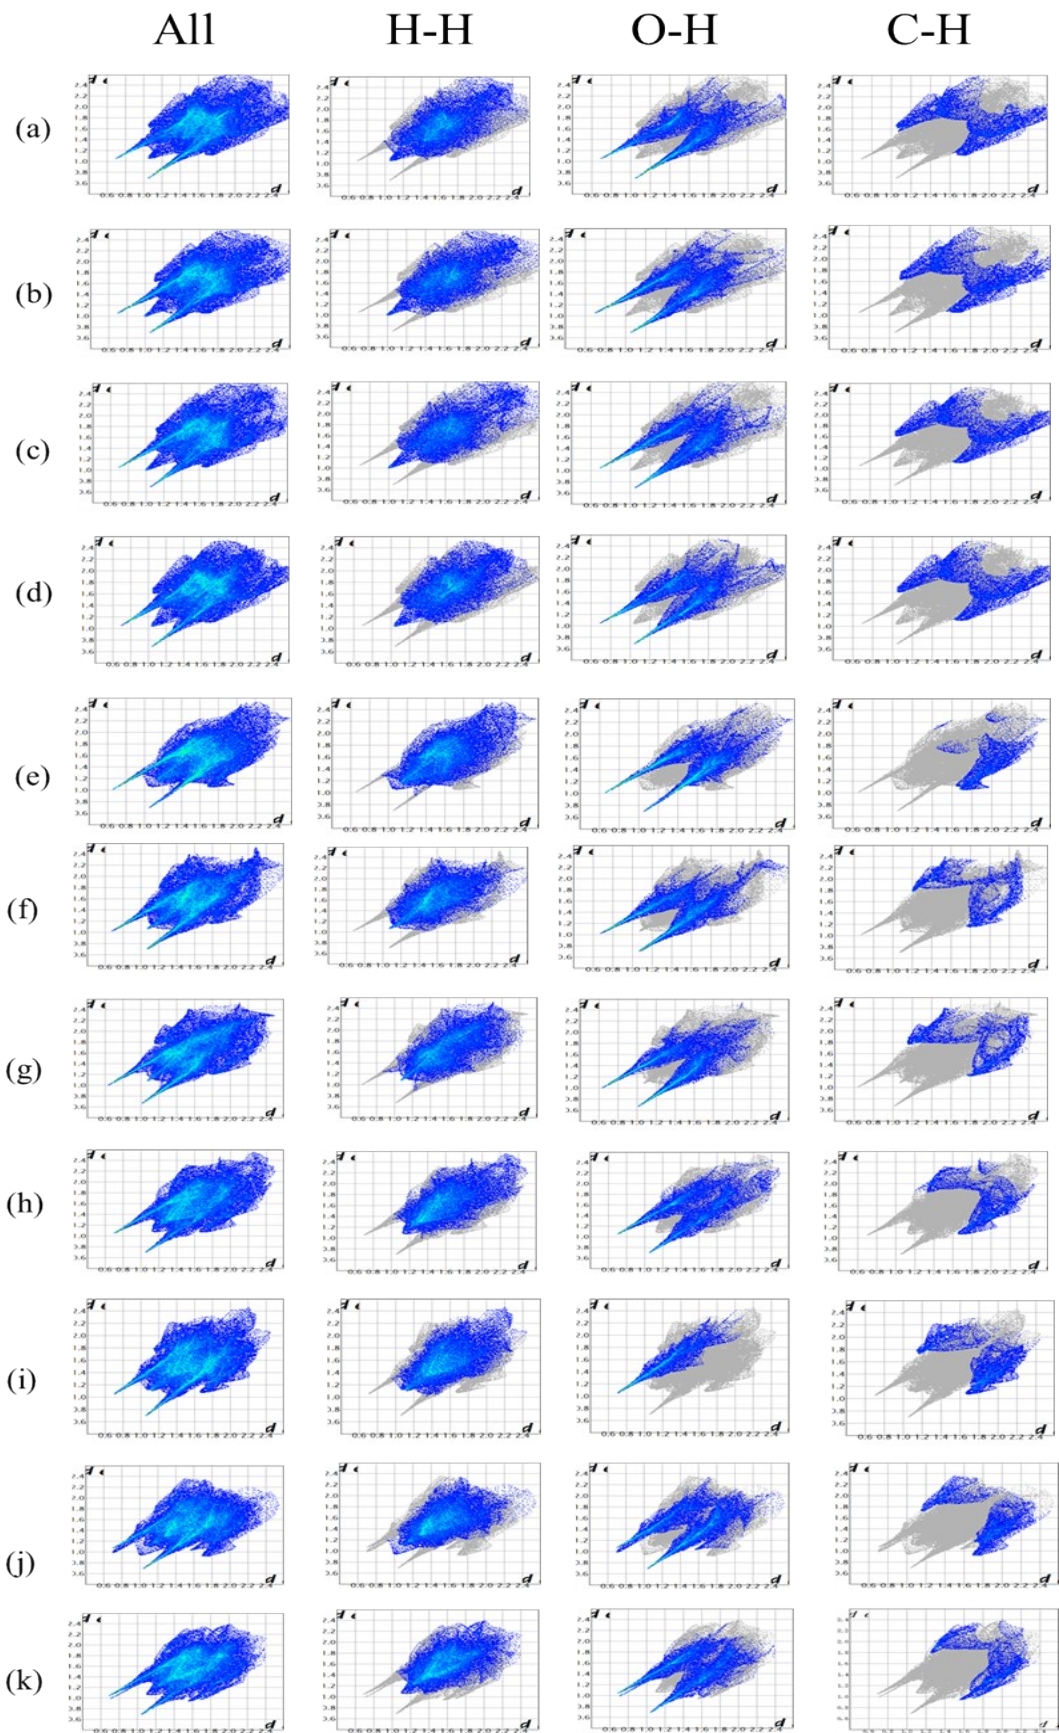

Figure S8. 2D fingerprint plots of arbutin in: (a)Form I(A), (b) Form I(B),

(c) Form I(C), (d) Form I(D), (e) solvate S1(E), (f) solvate S3(F), (g) solvate S3(G), (h) solvate S4(H), (i) solvate S4(I), (j) solvate S5(J), and (k) solvate S5(K).

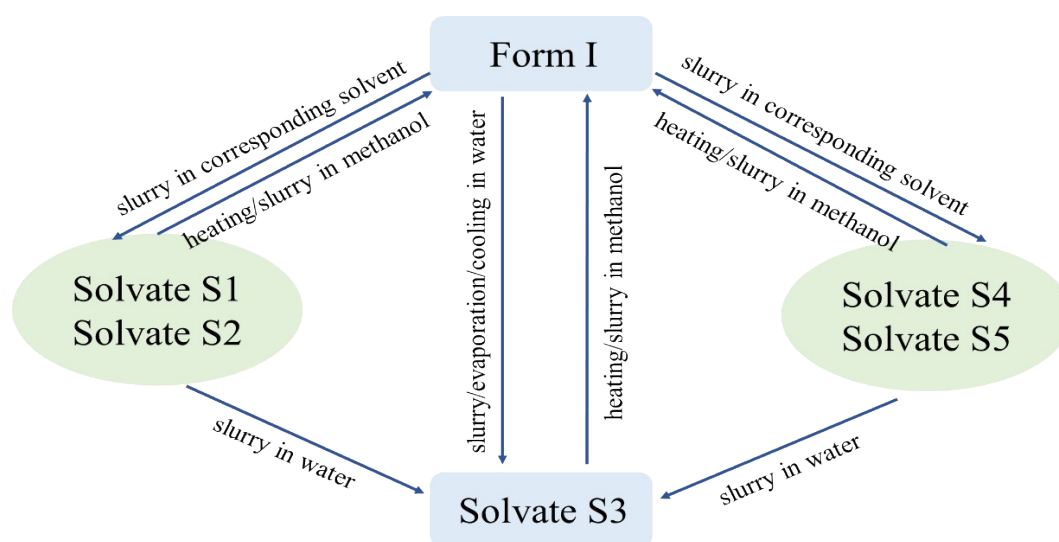

Figure S9. Interconversion between different solid forms of arbutin.

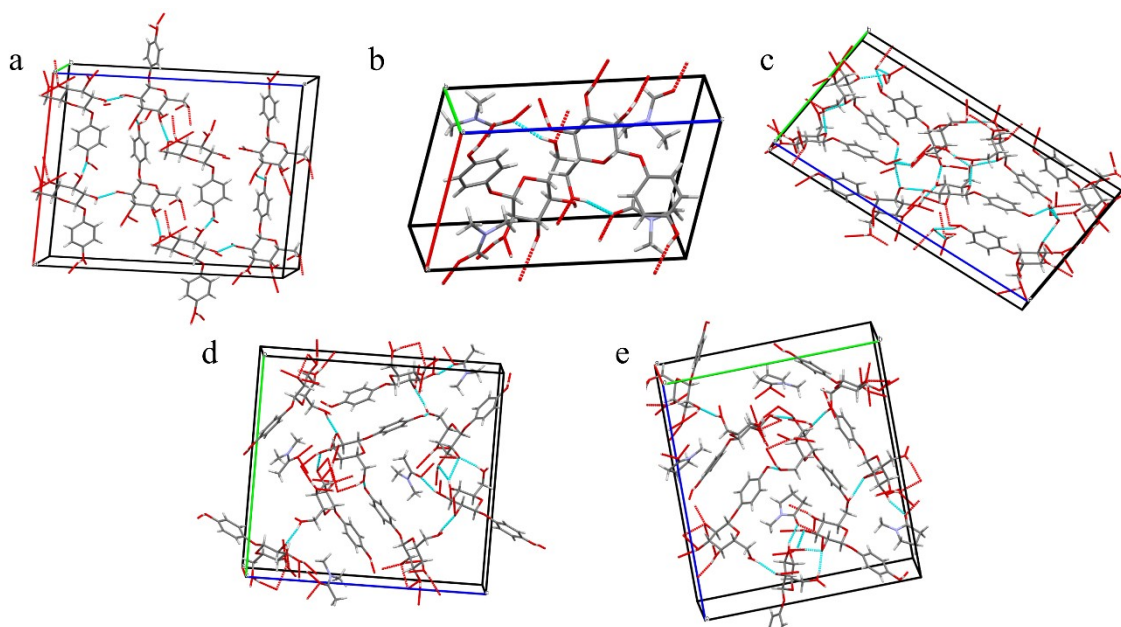

Figure S10. Hydrogen bond interactions in the cell of (a)Form I, (b) solvate S1, (c) solvate S3, (d) solvate S4, (e) solvate S5

Table S4. Contacts lists in the unit cell

|            | Atom 1     | Atom 2 | Length | Length-VsW |
|------------|------------|--------|--------|------------|
| Form I     | O5         | H4     | 2.109  | -0.611     |
|            | O1         | H6AA   | 2.010  | -0.710     |
|            | H1         | O6A    | 1.931  | -0.789     |
|            | O6         | H1A    | 2.044  | -0.676     |
|            | H6         | O1A    | 1.899  | -0.821     |
|            | H5         | O4A    | 1.920  | -0.800     |
|            | O4         | H5AA   | 1.903  | -0.817     |
|            | H7         | O7B    | 1.967  | -0.753     |
|            | O7         | H7B    | 2.119  | -0.601     |
|            | O5A        | H4A    | 2.042  | -0.678     |
|            | H7AA       | O7D    | 2.009  | -0.711     |
|            | O5B        | H4B    | 2.110  | -0.610     |
|            | H5B        | O4B    | 1.921  | -0.799     |
|            | H6B        | O1D    | 2.027  | -0.693     |
|            | O6B        | H1D    | 1.921  | -0.799     |
|            | O1B        | H6D    | 2.009  | -0.711     |
|            | H1B        | O6D    | 1.925  | -0.795     |
|            | O5D        | H4D    | 2.045  | -0.675     |
|            | H5D        | O4D    | 1.904  | -0.816     |
|            | solvate S1 | O4     | H6     | 1.956      |
| O7         |            | H5     | 1.896  | -0.824     |
| H4         |            | O8     | 1.952  | -0.768     |
| H7         |            | O8     | 1.820  | -0.900     |
| H1         |            | O9     | 1.815  | -0.905     |
| solvate S3 | H6         | O5     | 1.910  | -0.810     |
|            | H7         | O6     | 1.938  | -0.782     |
|            | O3         | H4A    | 2.046  | -0.674     |
|            | H4         | O3A    | 1.947  | -0.773     |
|            | O4         | H5AA   | 1.880  | -0.840     |
|            | H5         | O6A    | 1.989  | -0.731     |
|            | O7         | H8B    | 2.200  | -0.520     |
|            | H1         | O8     | 1.719  | -0.749     |
|            | O5A        | H7AA   | 1.969  | -0.751     |
|            | O4A        | H6AA   | 1.990  | -0.730     |
|            | O7A        | H10B   | 1.944  | -0.776     |
|            | H1A        | O10    | 2.003  | -0.717     |
|            | O1A        | H8B    | 2.463  | -0.257     |
|            | H10C       | O8     | 2.019  | -0.701     |

|            |      |      |       |        |
|------------|------|------|-------|--------|
| solvate S4 | O5   | H7   | 1.995 | -0.725 |
|            | H4   | O7A  | 1.891 | -0.829 |
|            | H5   | O6A  | 2.105 | -0.615 |
|            | H5   | O7A  | 2.405 | -0.315 |
|            | O6   | H6AA | 1.901 | -0.819 |
|            | H1   | O4A  | 1.935 | -0.785 |
|            | O7   | H4A  | 1.898 | -0.822 |
|            | O4   | H1A  | 1.922 | -0.789 |
|            | H6   | O8   | 1.882 | -0.838 |
|            | O5A  | H7AA | 1.884 | -0.836 |
|            | H5AA | O8   | 1.944 | -0.776 |
| solvate S5 | O5   | H7   | 1.865 | -0.855 |
|            | H6   | O6A  | 1.885 | -0.835 |
|            | O6   | H5AA | 2.158 | -0.562 |
|            | O7   | O4A  | 1.933 | -0.787 |
|            | O7   | H5AA | 2.302 | -0.418 |
|            | O4   | H1A  | 1.926 | -0.794 |
|            | H4   | O7A  | 1.940 | -0.780 |
|            | H1   | O4A  | 1.938 | -0.782 |
|            | H5   | O8   | 1.837 | -0.883 |
|            | O5A  | H7AA | 1.981 | -0.739 |
|            | H6AA | O8   | 1.938 | -0.782 |

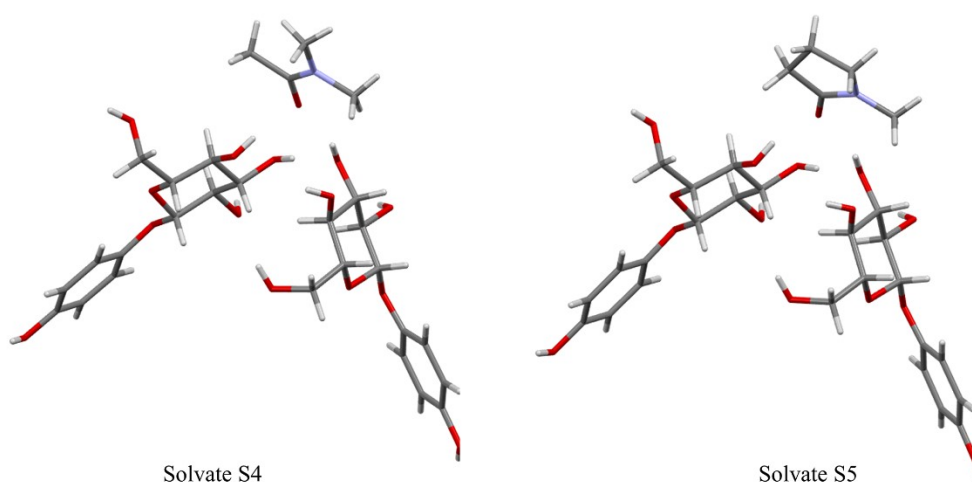

Figure S11. A comparison of the solvate S4 and S5 asymmetric units.

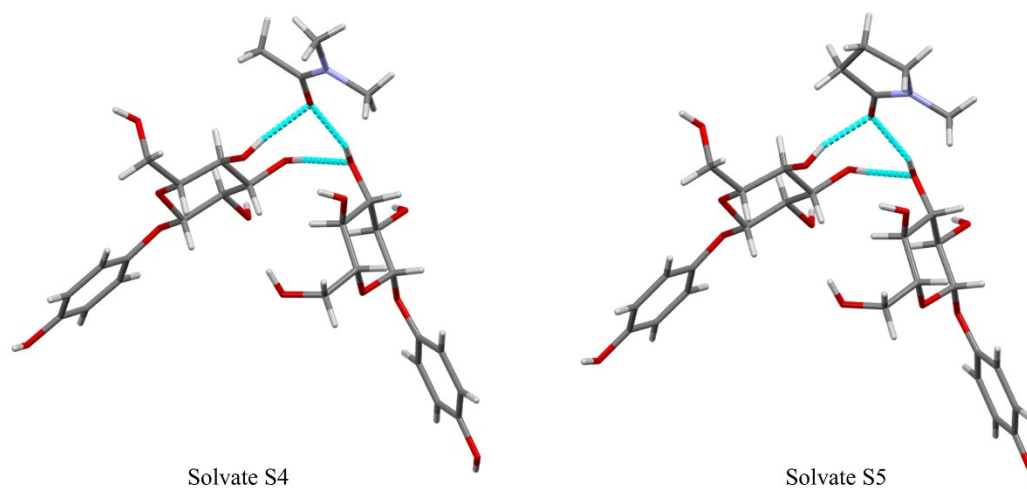

Figure S12. A comparison of the solvate S4 and S5 asymmetric units (with hydrogen bond interaction forces).

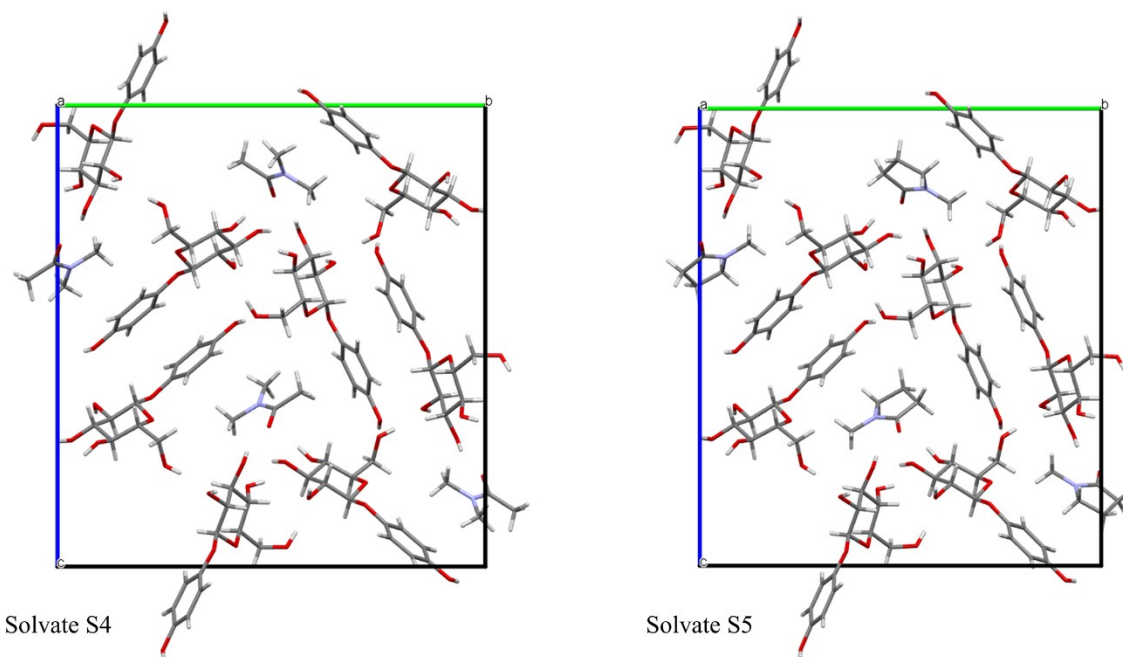

Figure S13. A comparison of the solvate S4 and S5 packing arrangements.

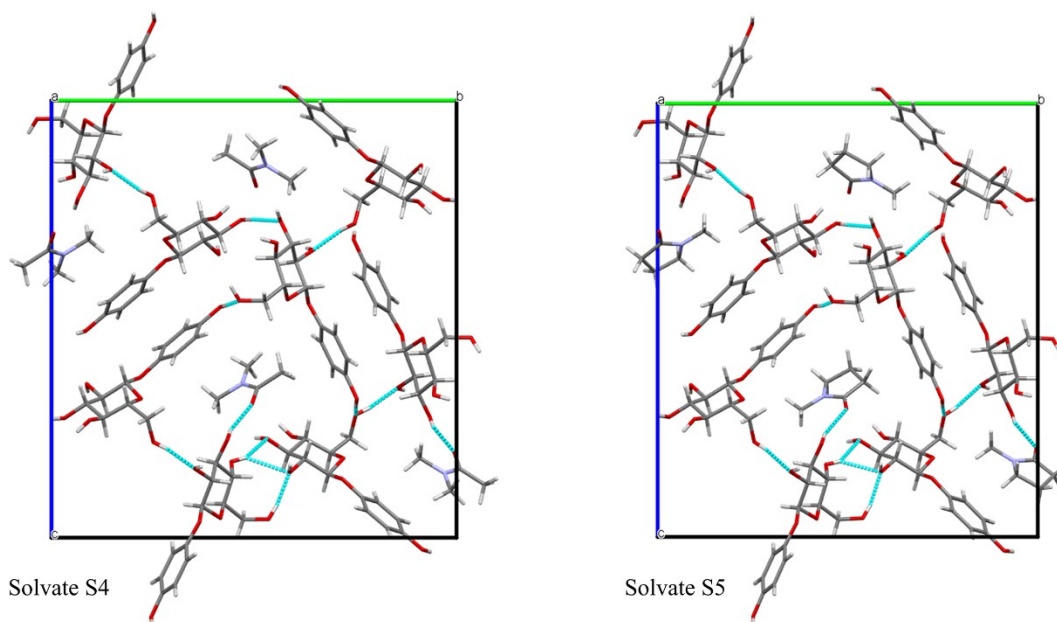

Figure S14. A comparison of the solvate S4 and S5 packing arrangements. (with hydrogen bond interaction forces).

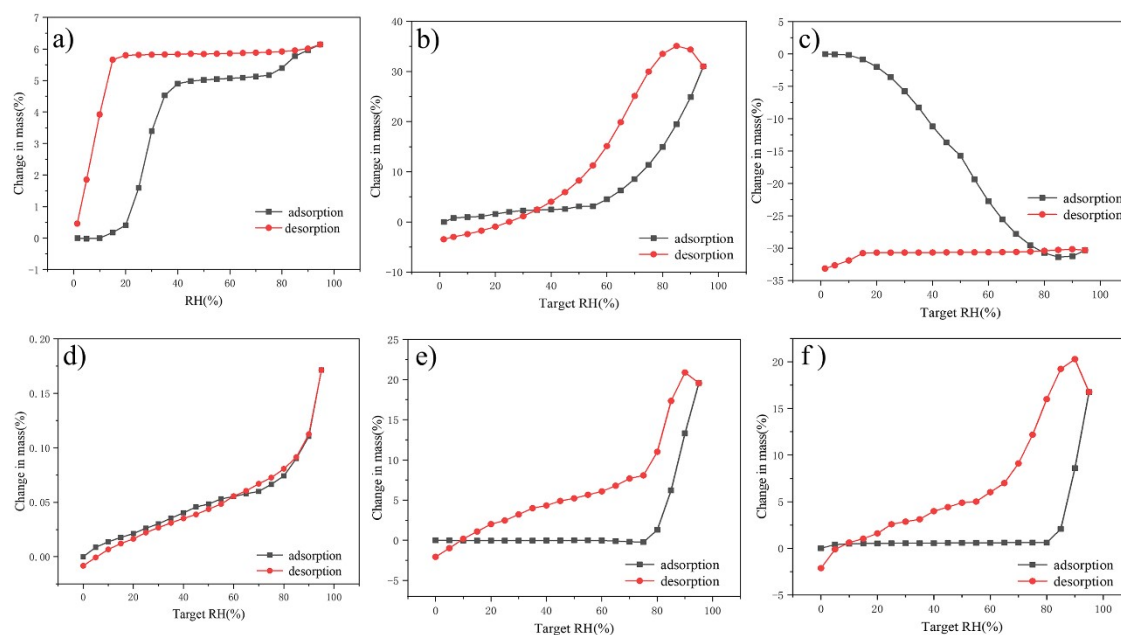

Figure S15. DVS diagrams of different solid forms of arbutin: (a) Form I, (b) solvate S1, (c) solvate S2, (d) solvate S3, (e) solvate S4, (f) solvate S5.
